# Supplementary material for: Fluorescent detection of TNT and 4-nitrophenol by BSA Au nanoclusters
Source: Royal Society of Chemistry journal article supplement (doi:10.1039/c4dt00490f), 2014-01-01
Supplement: c4dt00490f1.pdf [file c4dt00490f1.pdf]

## Supporting Information

### Colorimetric and fluorescent Detection for TNT and 4-Nitrophenol by BSA Au nanoclusters

Xin Yang,<sup>a</sup> Junhai Wang,<sup>a</sup> Dongyue Su,<sup>a</sup> Qingdong Xia,<sup>a</sup> Fang Chai,<sup>\*a</sup>

Chungang Wang<sup>\*b</sup> and Fengyu Qu<sup>\*a</sup>

<sup>a</sup> Key Laboratory of Design and Synthesis of Functional Materials and Green Catalysis, Colleges of Heilongjiang Province, Harbin Normal University, 150025, P.R. China.

<sup>b</sup> Faculty of Chemistry, Northeast Normal University, Changchun, 130024, P.R. China.

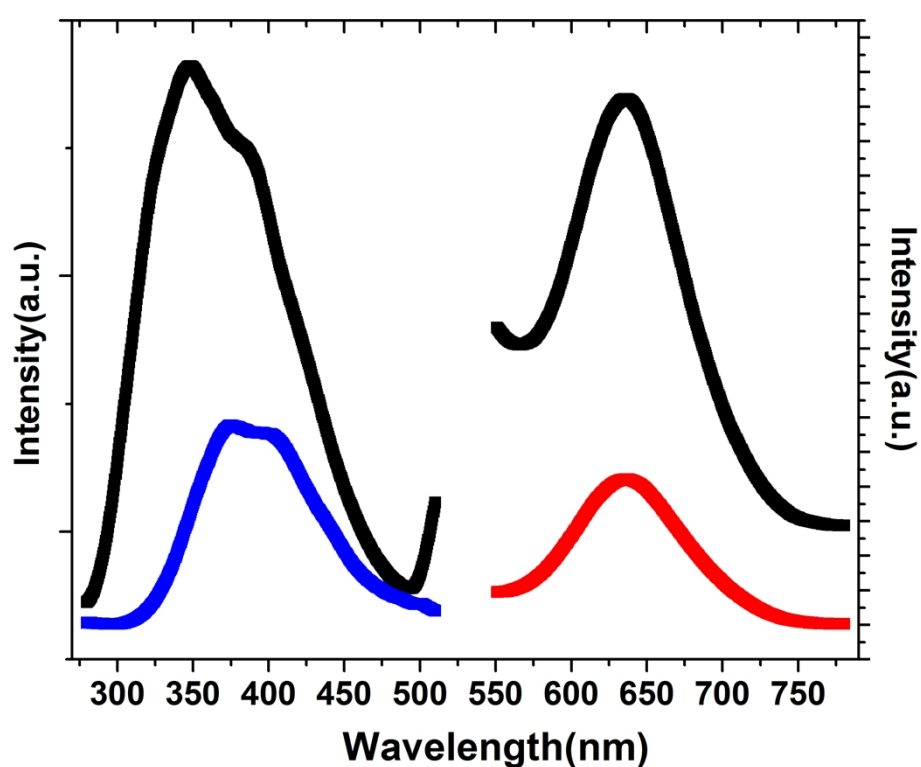

**Fig. S1.** The fluorescence emissions of BSA Au Nanoclusters excited at 260 nm (blue) and 470 nm (red), respectively.

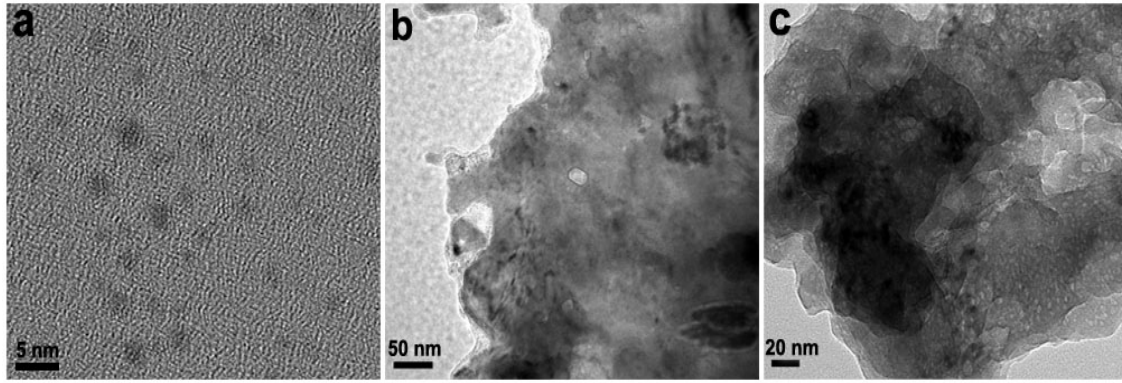

**Fig. S2.** TEM image of BSA Au-NCs (a) as prepared and after addition of (b) TNT (c) 4-NP.

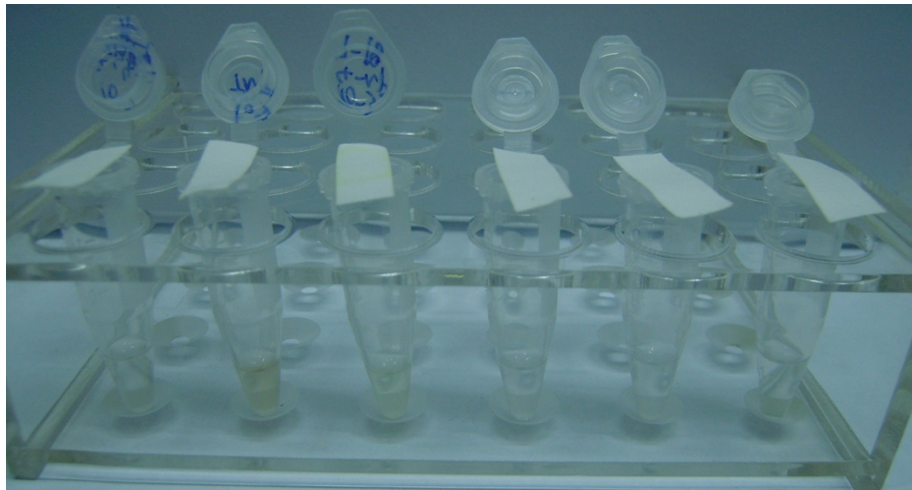

**Fig. S3.** Image of experiment of detection for nitroaromatics by BSA Au-NCs test papers

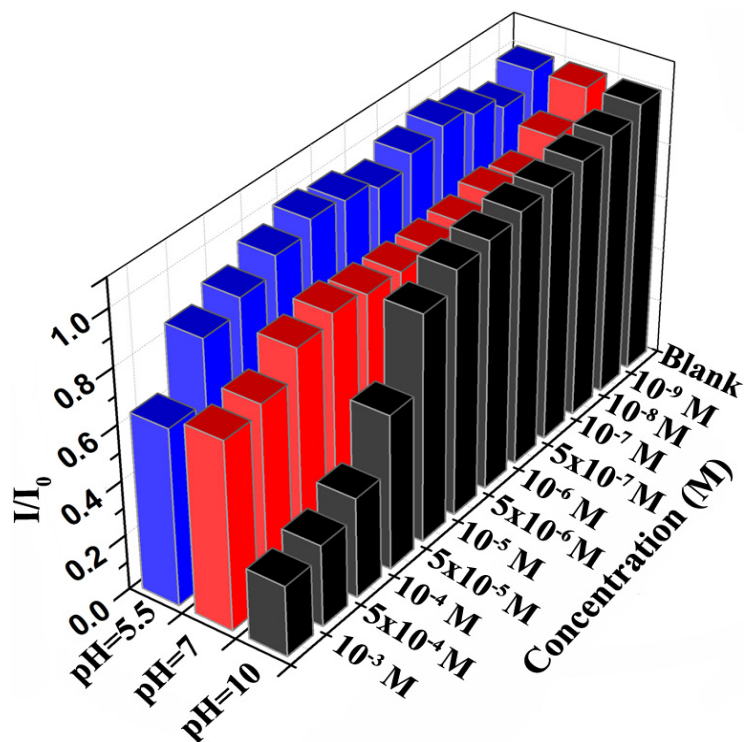

**Fig. S4.** The values ( $I/I_0$ ) of BSA Au-NCs (prepared at pH values was 5.5, 7 and 10, respectively) with addition of TNT ( $10^{-3}$ - $10^{-9}$  M).

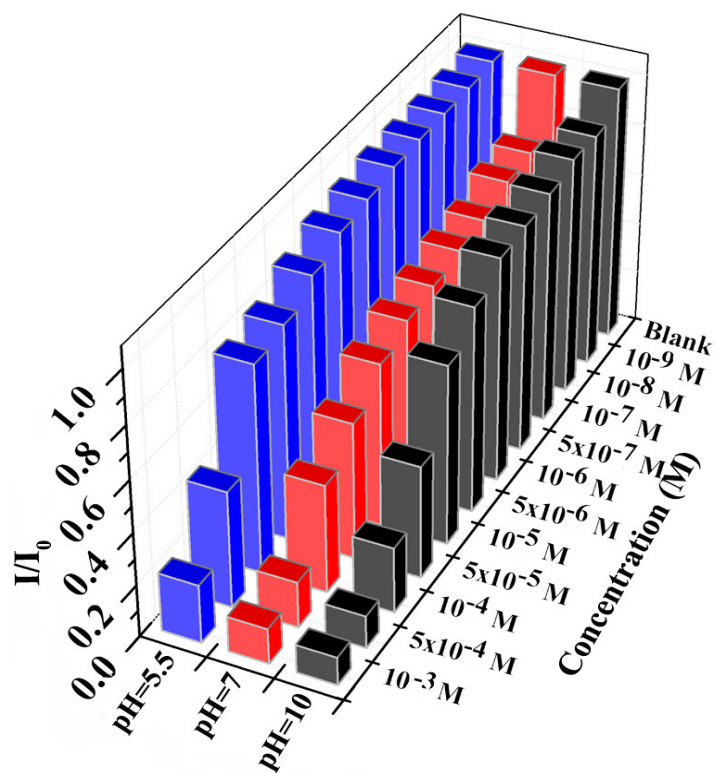

**Fig. S5.** The values ( $I/I_0$ ) of BSA Au-NCs (prepared at pH values was 5.5, 7 and 10, respectively) with addition of 4-NP ( $10^{-3}$ - $10^{-9}$  M).

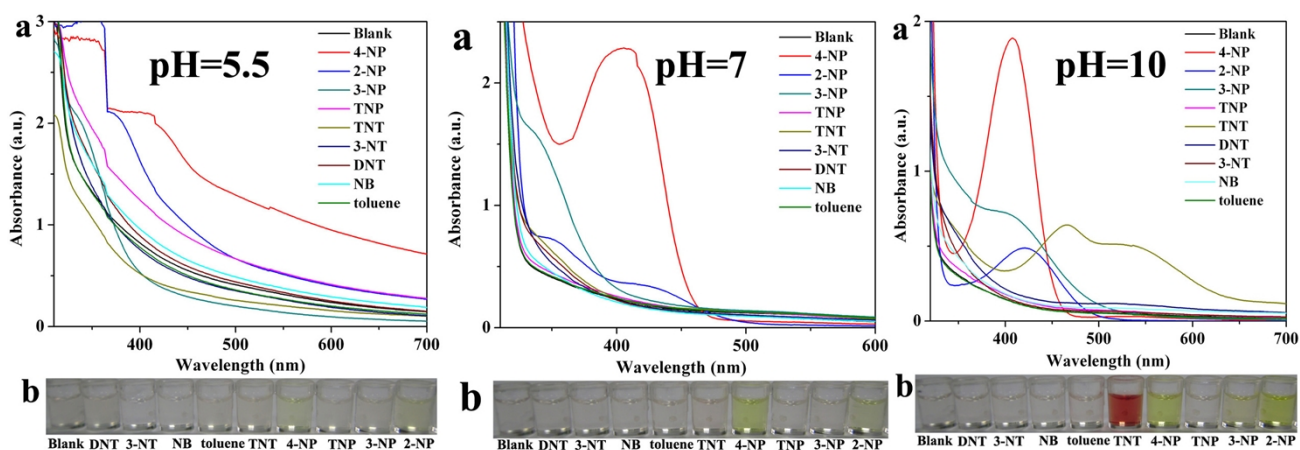

**Fig. S6.** (a) UV-vis absorption spectra of BSA Au-NCs in presence of different nitroaromatic compounds at different pH values. (b) Photographs of the different explosives at different pH values under visible light.

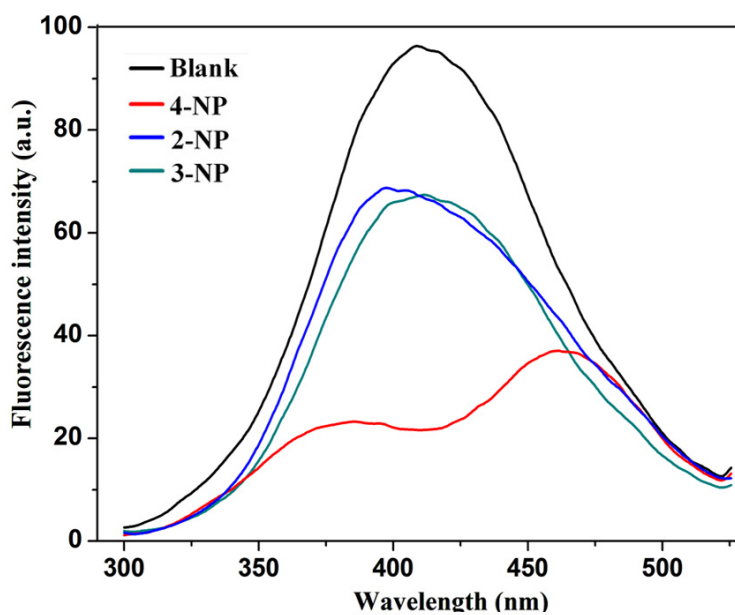

**Fig. S7.** The fluorescence emission of BSA Au-NCs reacted with 10<sup>-4</sup> M of 2-NP, 3-NP and 4-NP, respectively.
